# Supplementary material
Source: PubMed Central journal article supplement (PMC2573924)
Supplement: pbio.0060250.sg001.pdf [file pbio.0060250.sg001.pdf]

HVC-R

LMAN-R

0.1s

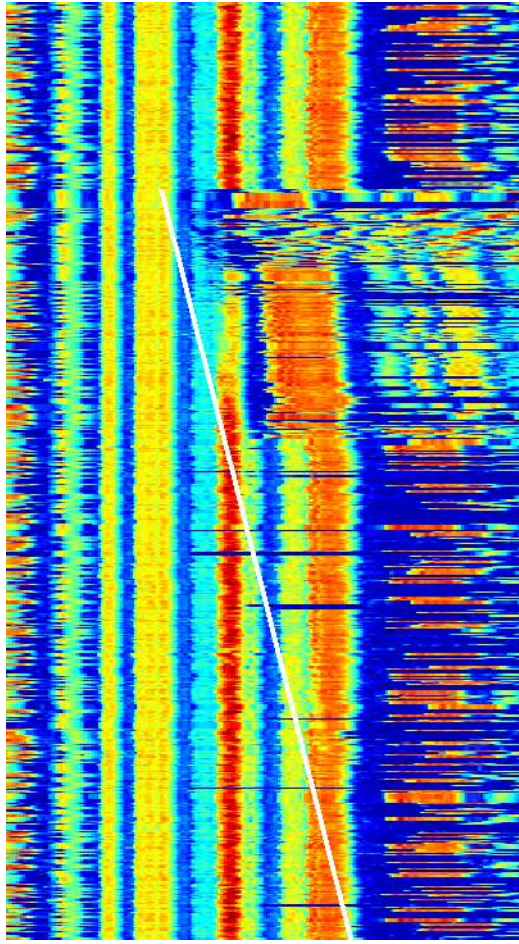

LE 1 0 0 1

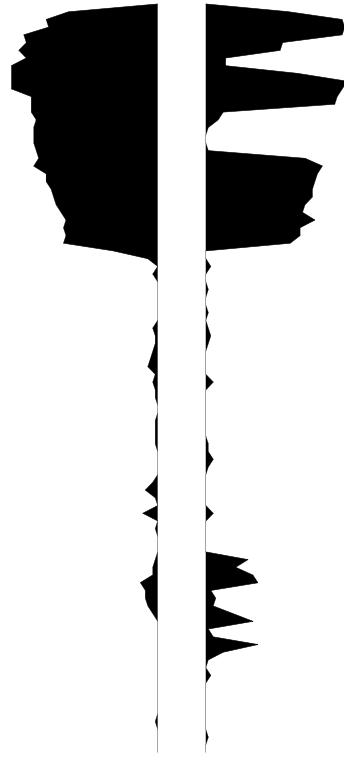

0.2s

CC: 0.51  
ipsilateral  
bird: g17k-p2

HVC-long

HVC-short

0.1s

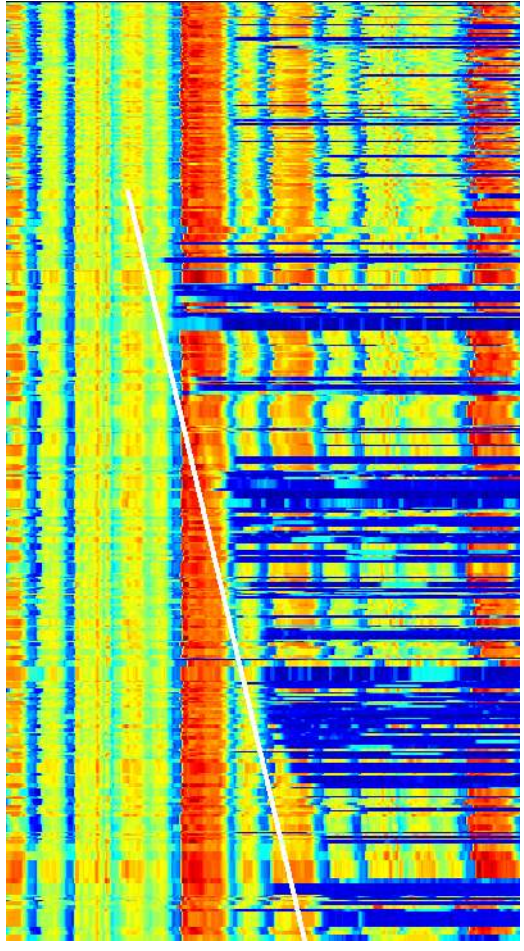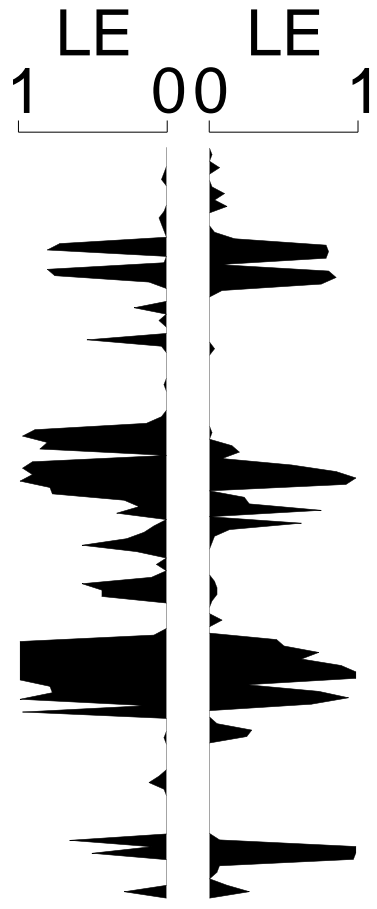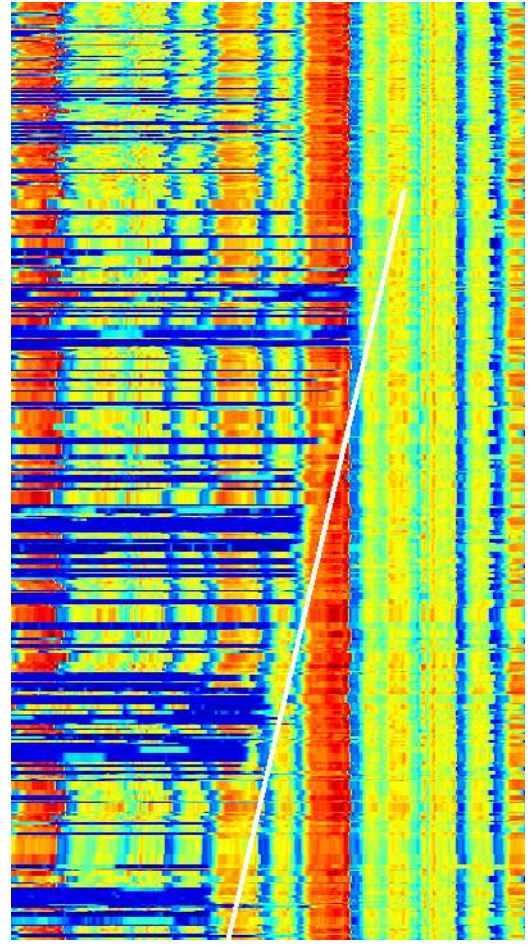

0.2s

CC: 0.46

ipsilateral

bird: red13

HVC-long

HVC-short

0.1s

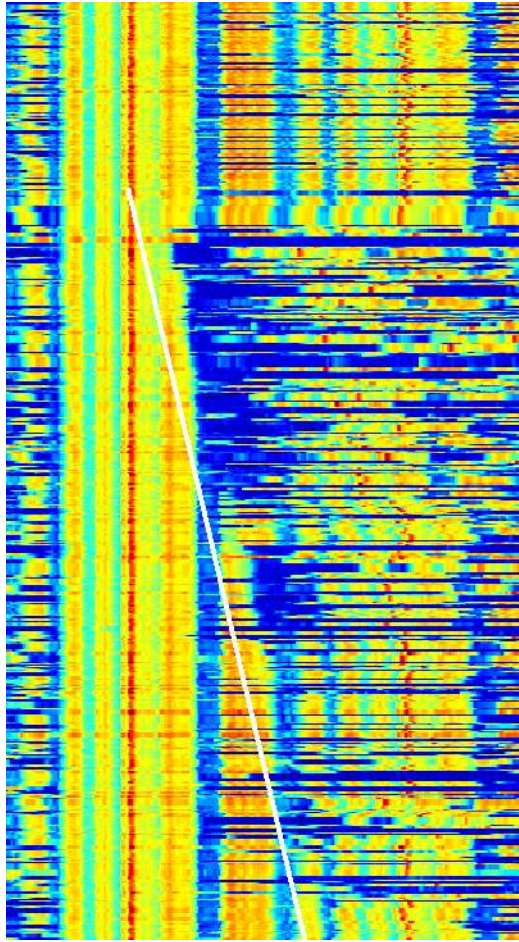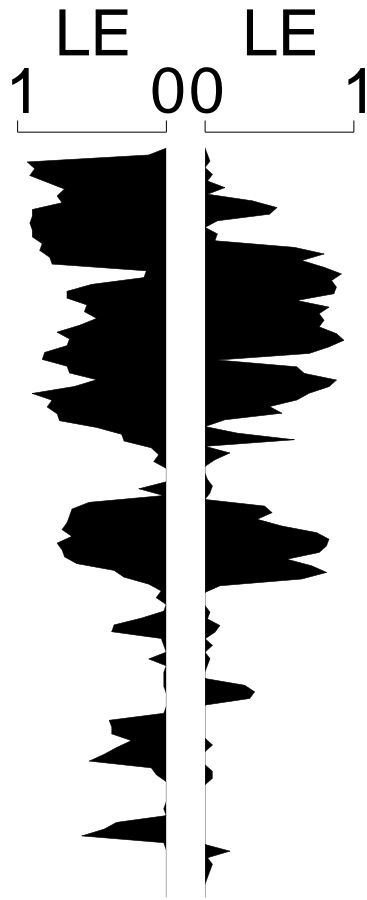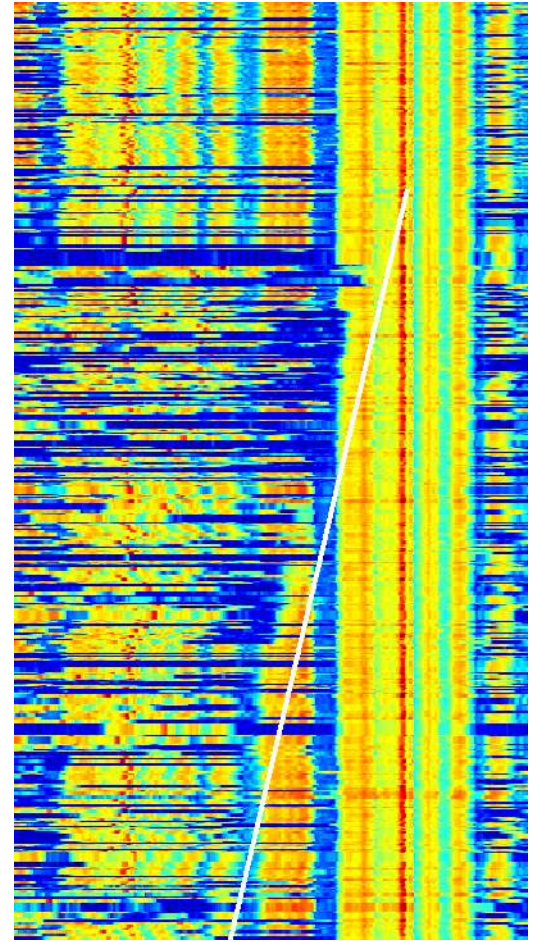

0.2s

CC: 0.38  
ipsilateral  
bird: yellow13

HVC-long

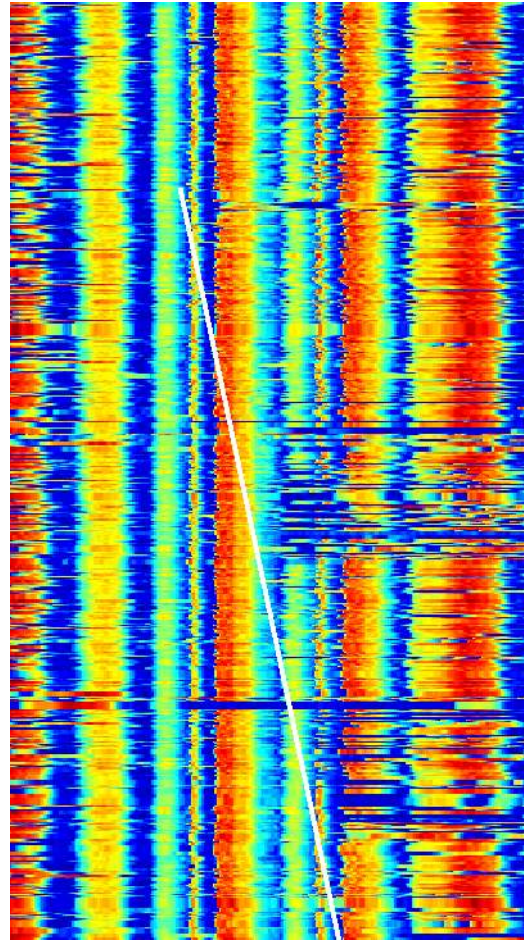

0.4s

HVC-short

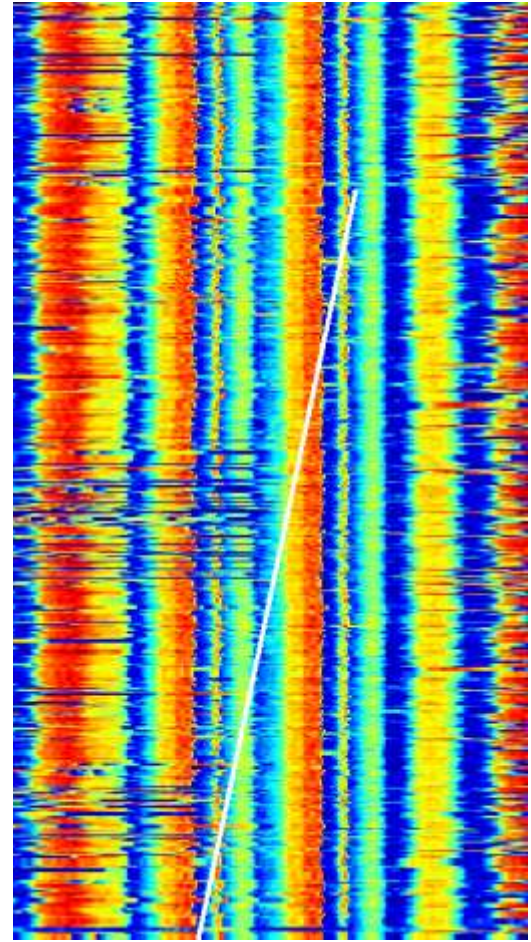

LE 1 00 1

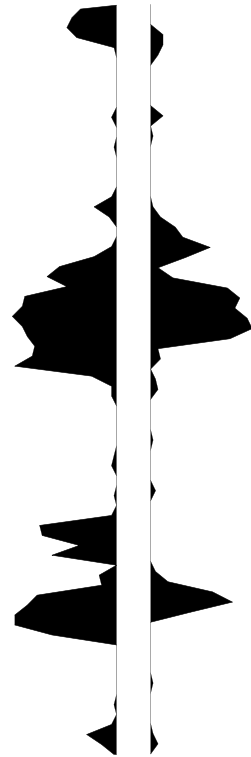

CC: 0.25  
ipsilateral  
bird: yellow18

HVC-L

HVC-R

0.1s

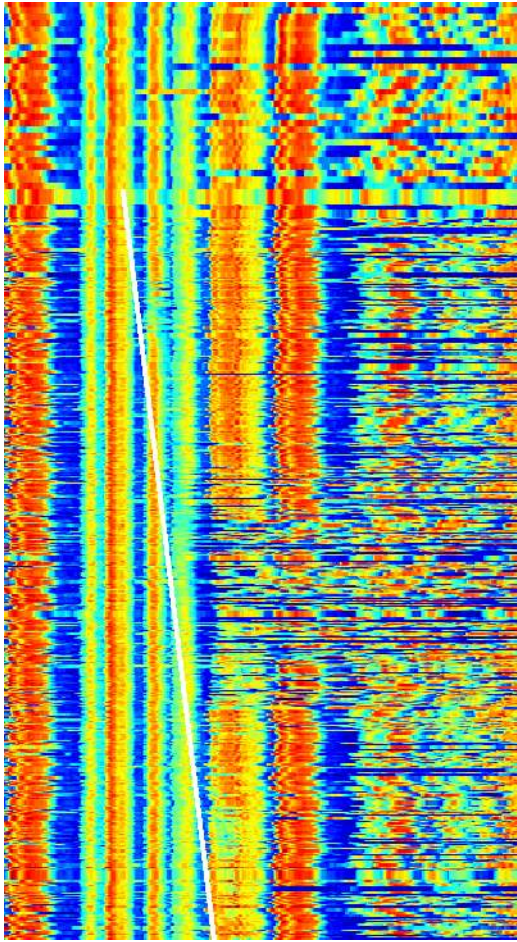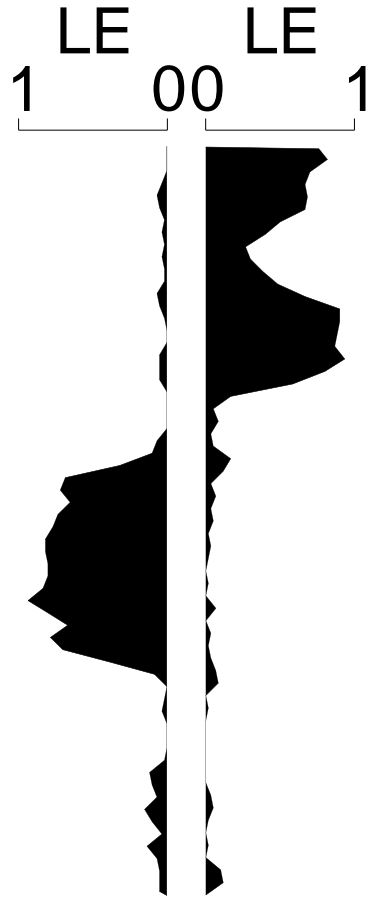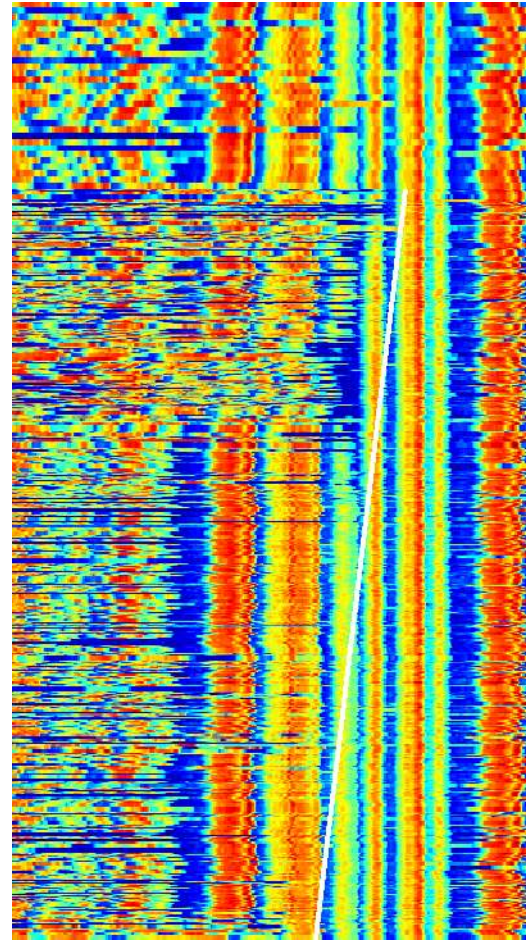

0.2s

CC: -0.61  
contralateral  
bird: blue6

HVC-L

HVC-R

0.1s

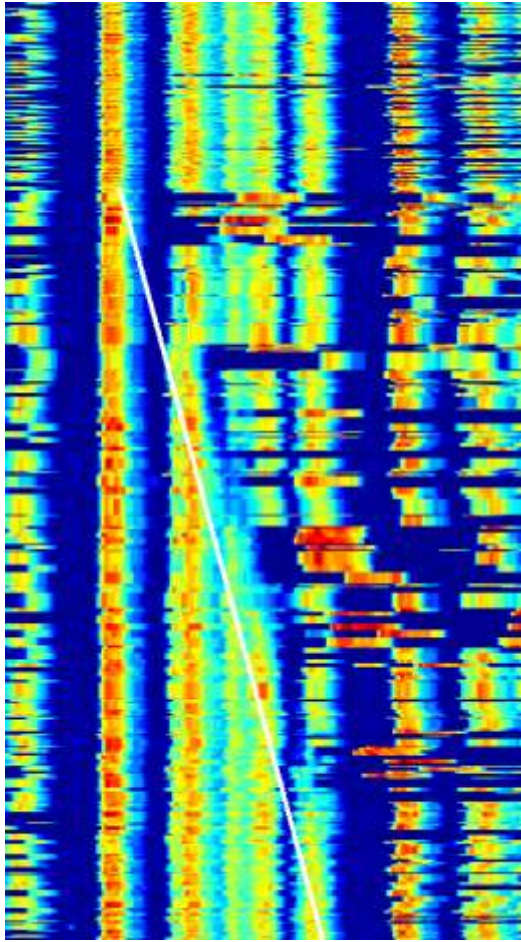

0.2s

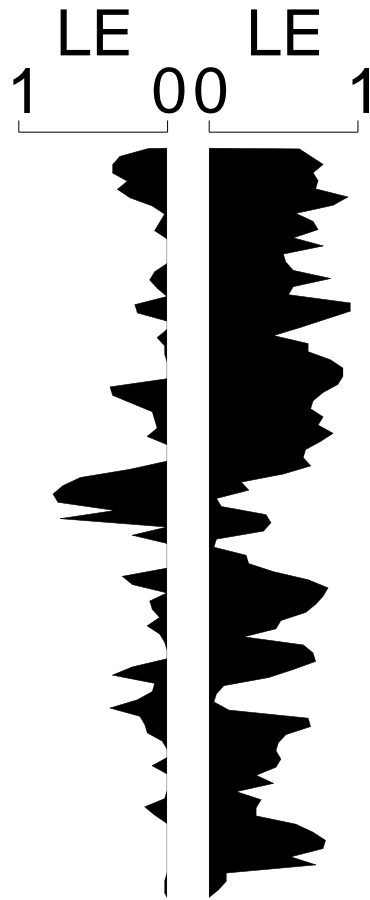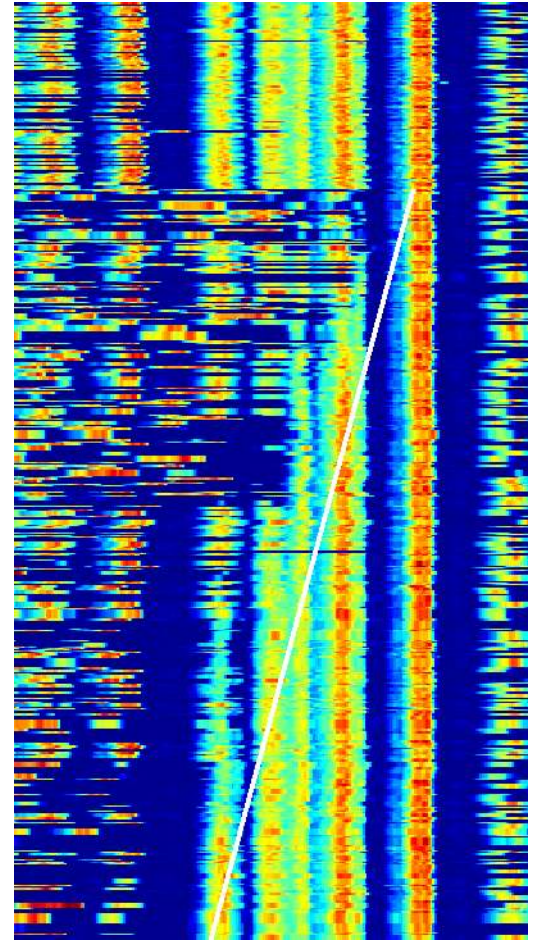

CC: -0.19  
contralateral  
bird: r6o-s2

HVC-L

HVC-R

0.1s

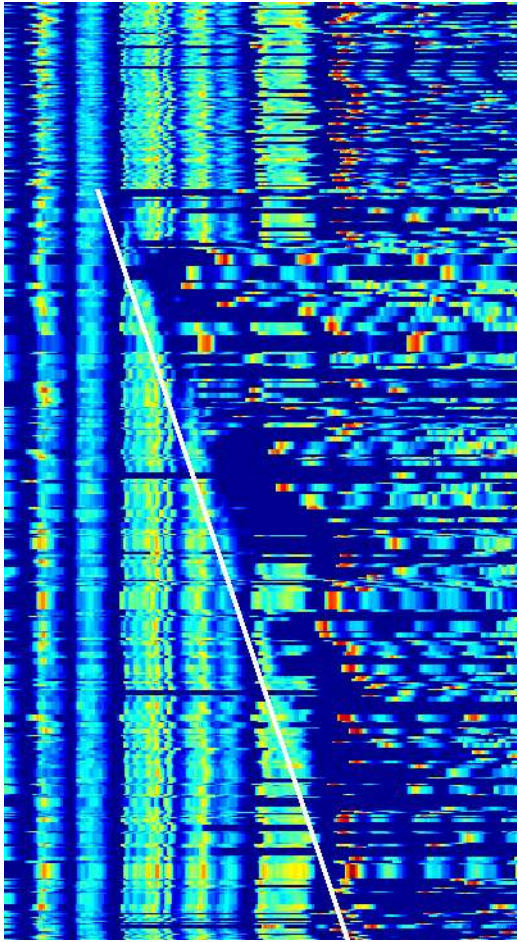

0.2s

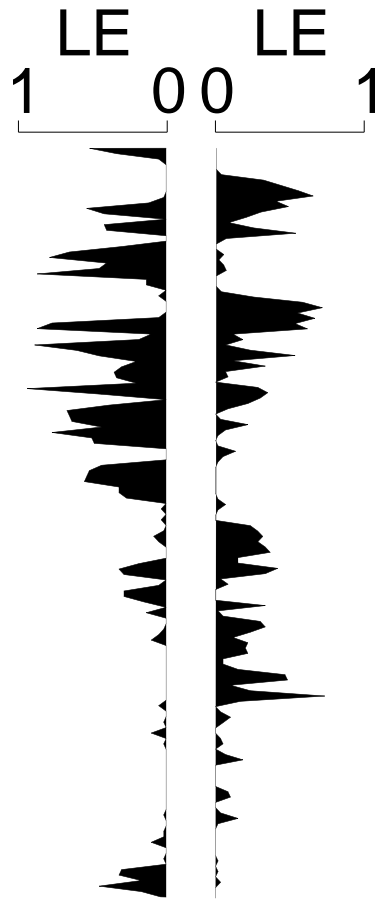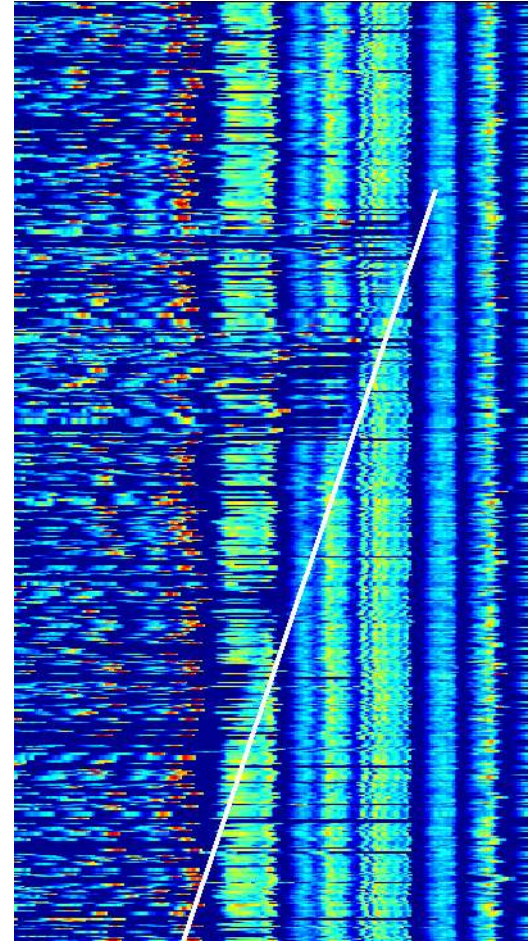

CC: -0.30  
contralateral  
bird: red14

HVC-L

HVC-R

0.1s

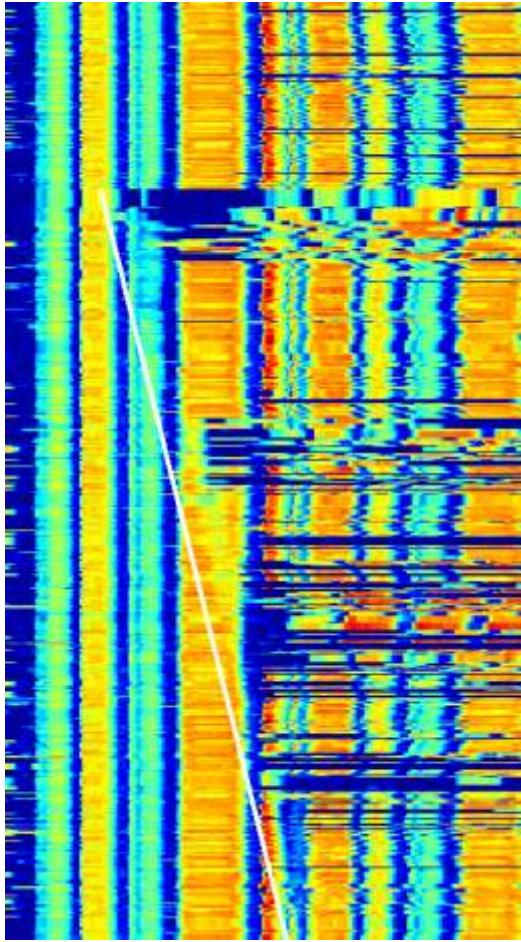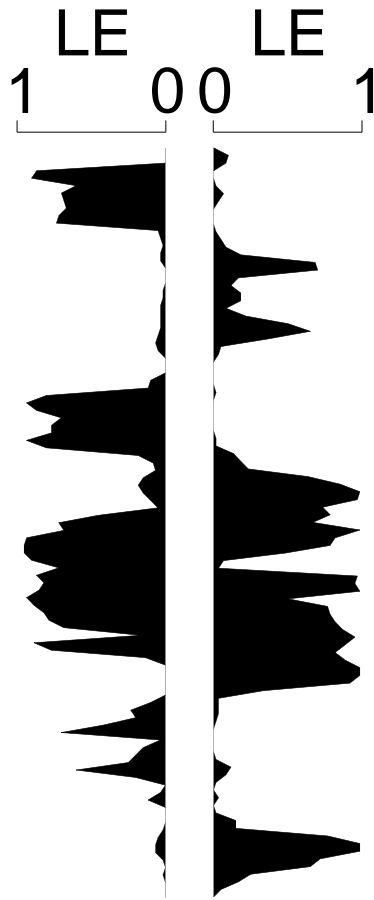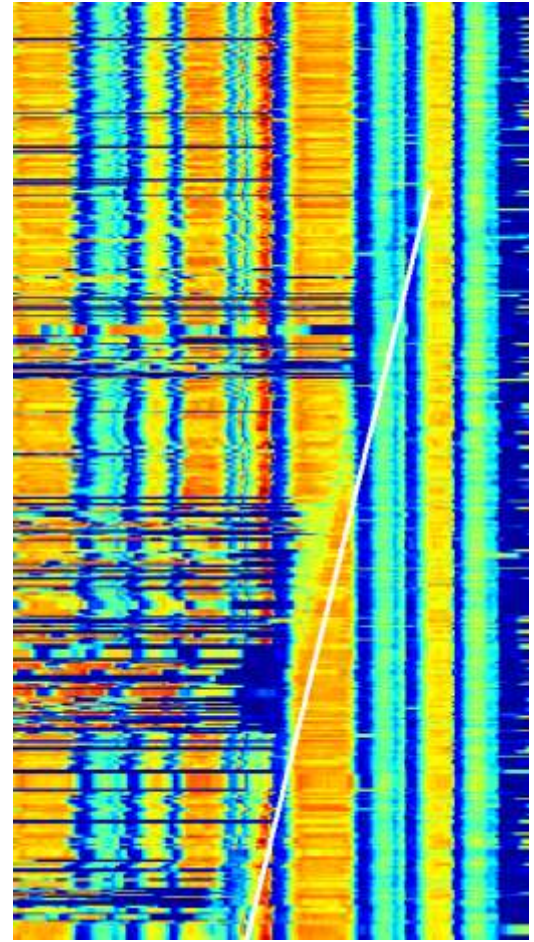

0.2s

CC: -0.04  
contralateral  
bird: y12k-s17



HVC-L

HVC-R

0.1s

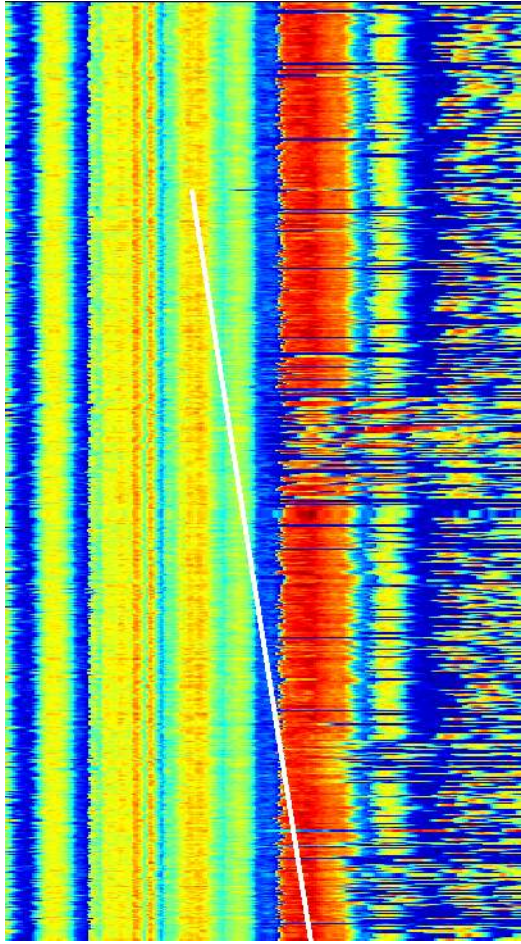

0.2s

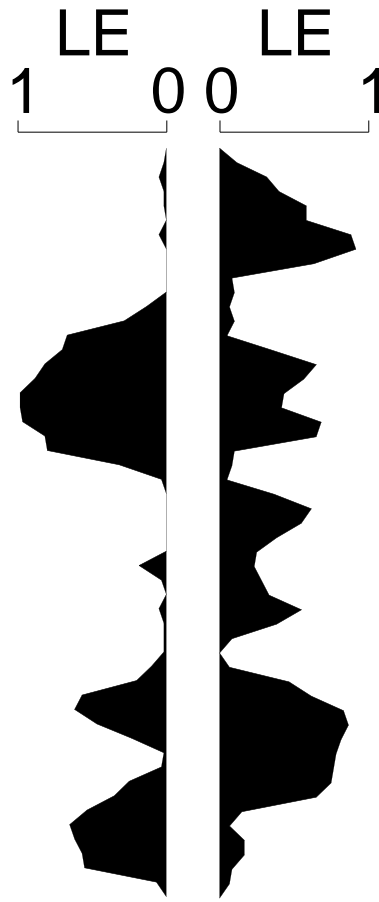

CC: -0.01  
contralateral  
bird: yellow2

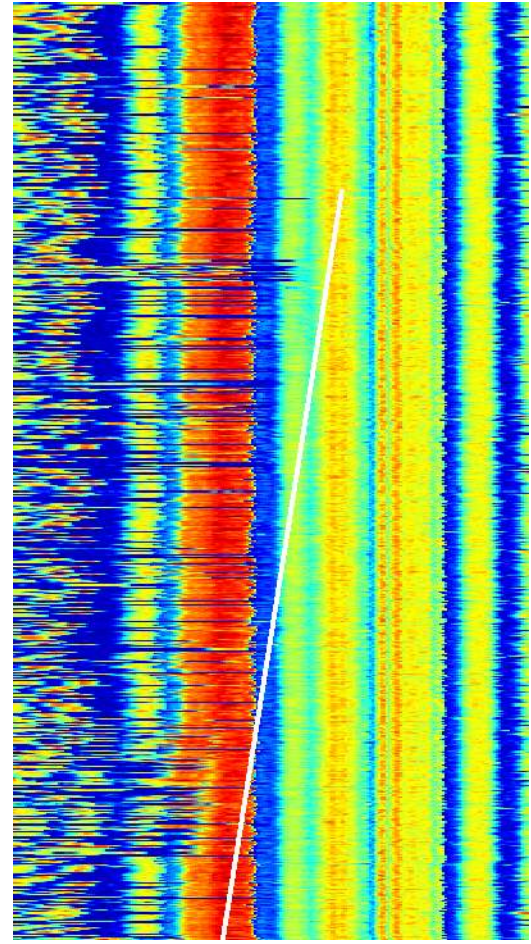

HVC-L

HVC-R

0.1s

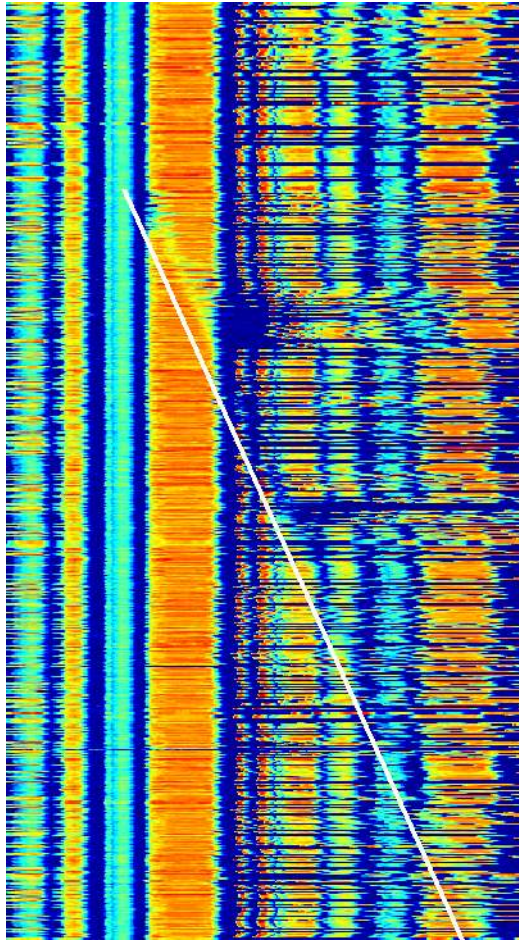

0.2s

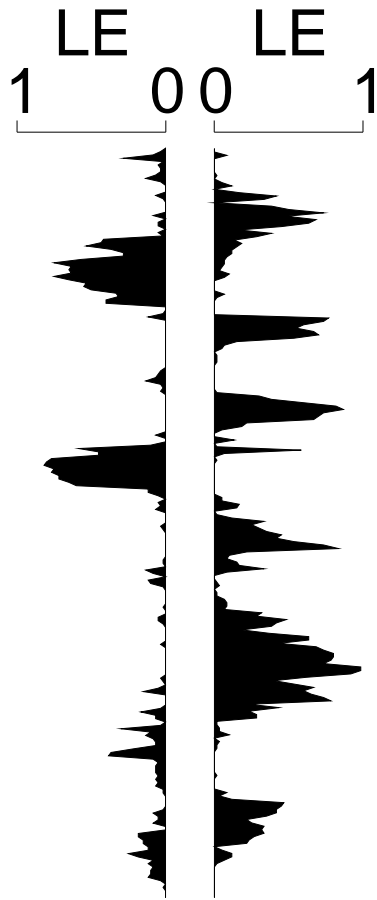

CC: -0.47  
contralateral  
bird: p15r1

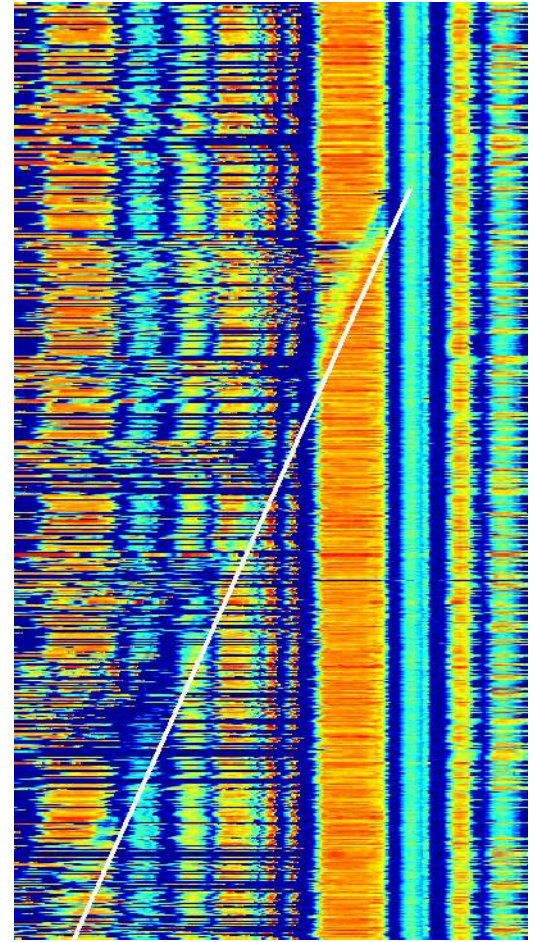

HVC-L

HVC-R

0.1s

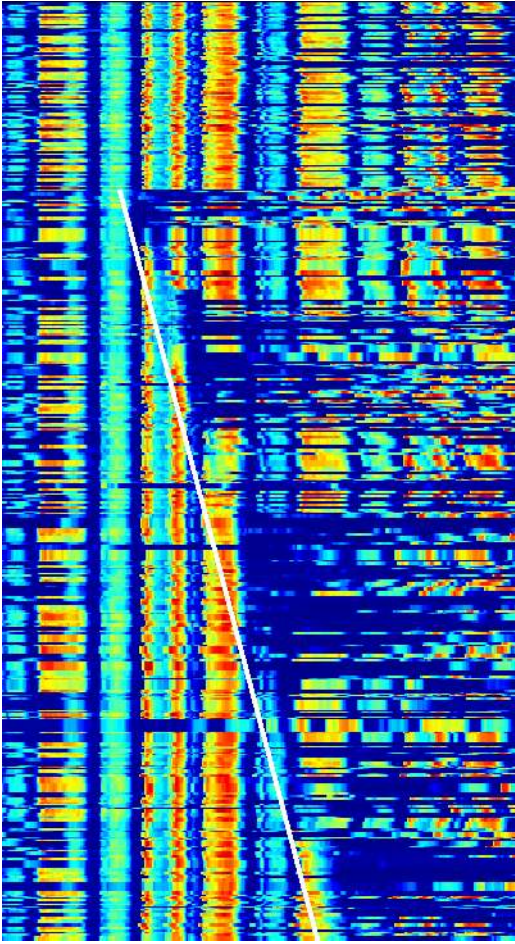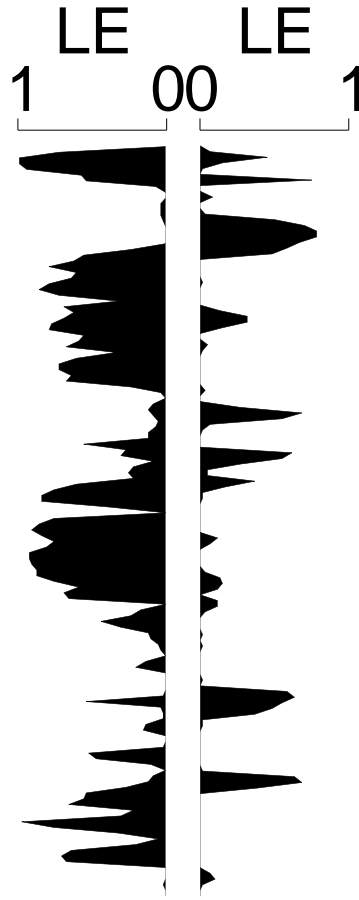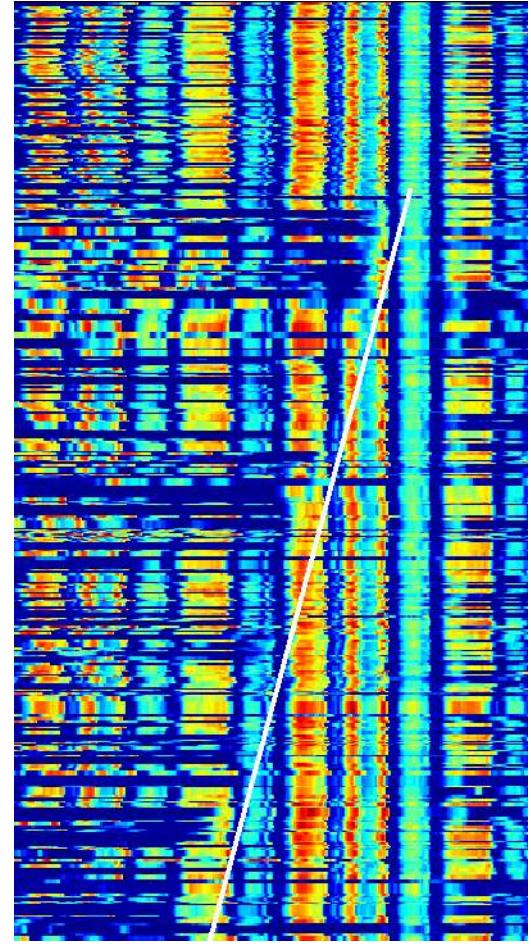

0.2s

CC: -0.38  
contralateral  
bird: p12o-r9k

HVC-L

HVC-R

0.1s

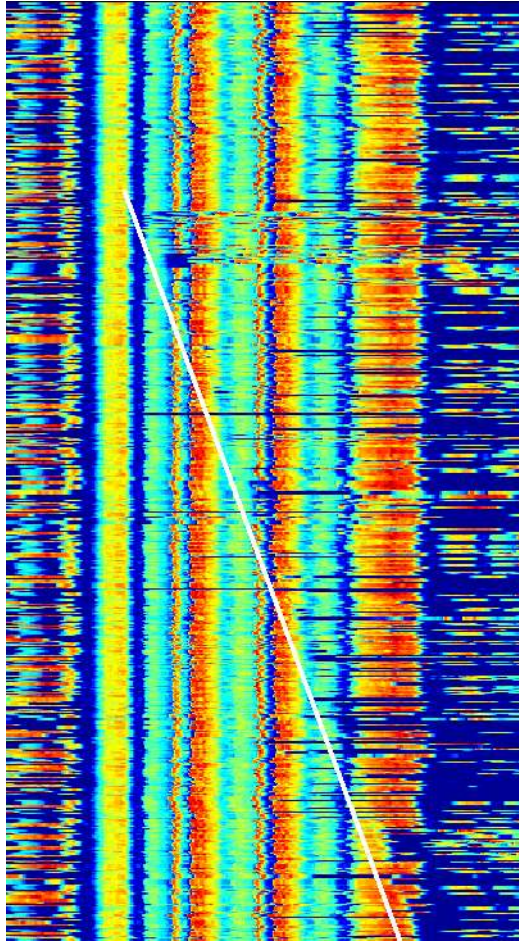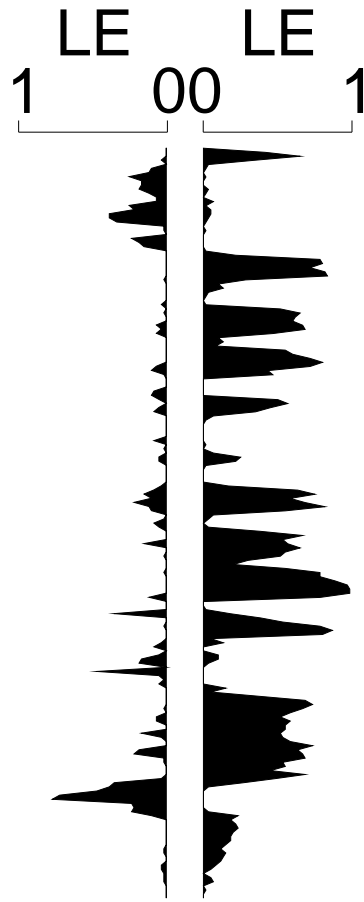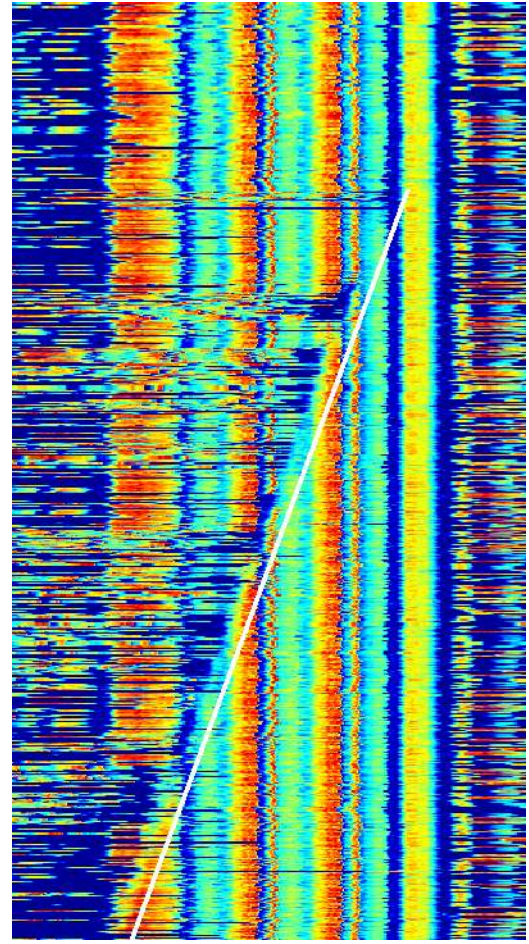

0.2s

CC: -0.45  
contralateral  
bird: o8k-y6

HVC-L

HVC-R

0.1s

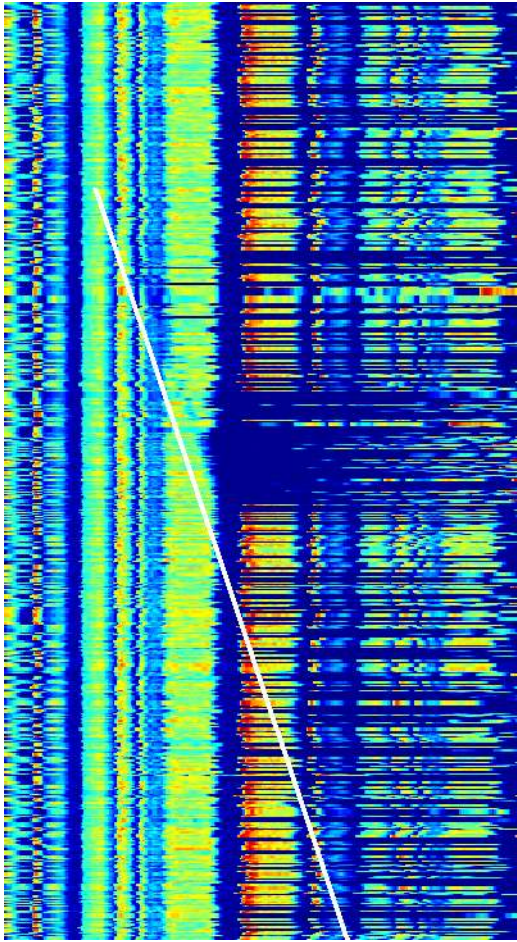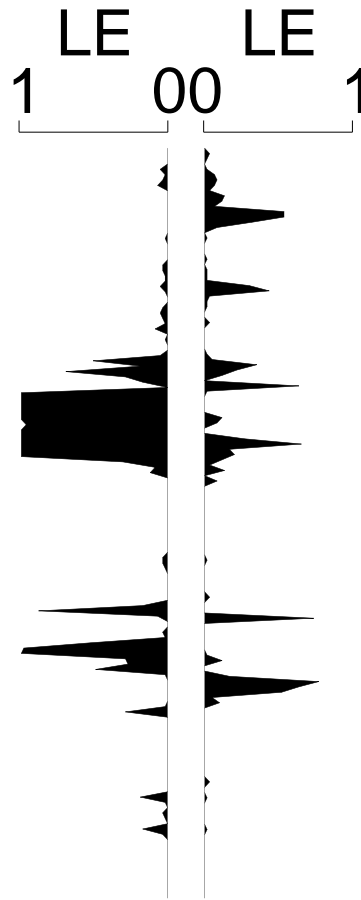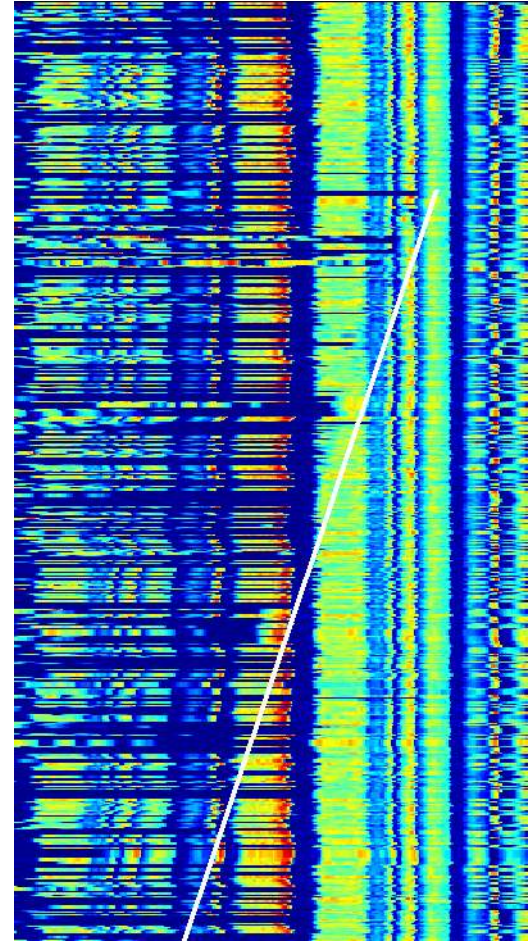

0.2s

CC: -0.34

contralateral

bird: y4o-wang
